# Supplementary material
Source: MDPI journal article supplement (https://www.mdpi.com/2311-5637/9/1/10)
Supplement: s1 [file s1]

**Table S1.** Mean values  $\pm$  standard error of the volatile aromatic compounds identified in the shiraz wine samples using gas chromatography mass spectroscopy.

| VAC   | RT    | S00          | S07          | S08          | S10          | S13          | S14          | S15           | S16          | S17          | S18          | S19          | S20          | S21          |
|-------|-------|--------------|--------------|--------------|--------------|--------------|--------------|---------------|--------------|--------------|--------------|--------------|--------------|--------------|
| VAC1  | 4.01  | 0.00         | 0.00         | 0.00         | 0.00         | 582,586.00   | 0.00         | 498,953.50    | 446,518.00   | 585,792.33   | 0.00         | 0.00         | 584,646.00   | 561,489.00   |
|       |       | $\pm 0.00$   | 97,846.09     | 75,102.17    | 89,434.04    | $\pm 0.00$   | $\pm 0.00$   | $\pm 0.00$   | 59,373.27    |
| VAC2  | 4.94  | 0.00         | 0.00         | 0.00         | 0.00         | 0.00         | 0.00         | 0             | 0            | 0.00         | 9,545,274.00 | 0            | 0            | 0            |
|       |       | $\pm 0.00$   | 2,192,038.98  | 773,588.05   | $\pm 0.00$   | $\pm 0.00$   | $\pm 0.00$   | 769,212.93   | 690,670.38   |
| VAC3  | 5.43  | 0.00         | 0.00         | 7,941,351.00 | 0.00         | 0            | 0.00         | 0.00          | 4,188,088.50 | 0.00         | 0.00         | 5,822,721.00 | 0.00         | 0.00         |
|       |       | $\pm 0.00$    | 2,590,621.59 | $\pm 0.00$   |
| VAC4  | 8.78  | 982,166.50   | 0.00         | 1,132,349.00 | 0.00         | 939,663.00   | 0.00         | 0.00          | 0.00         | 793,795.00   | 220,739.50   | 857,331.00   | 2,034,833.00 | 908,769.50   |
|       |       | 591,141.48   | $\pm 0.00$    | $\pm 0.00$   | 398,201.30   | 10,689.16    | 52,576.66    | 1,105,489.83 | 87,646.42    |
| VAC5  | 9.01  | 335,953.50   | 1,146,852.50 | 970,497.00   | 1,441,732.33 | 1,193,805.50 | 1,461,028.67 | 1,361,862.00  | 1,372,108.00 | 1,997,121.00 | 0.00         | 2,429,892.67 | 2,955,596.67 | 2,932,314.50 |
|       |       | 3205.16      | 11,076.18    | 267,996.35   | 75,017.59    | 19,150.52    | 89,458.74    | 213,343.70    | $\pm 0.00$   | 398,201.30   | 10,689.16    | 52,576.66    | 1,105,489.83 | 87,646.42    |
| VAC6  | 9.44  | 231,666.00   | 0.00         | 0.00         | 0.00         | 0.00         | 0.00         | 386,889.00    | 0.00         | 0.00         | 266,816.00   | 0.00         | 783,791.00   | 0.00         |
|       |       | $\pm 0.00$    | $\pm 0.00$   | $\pm 0.00$   | $\pm 0.00$   | $\pm 0.00$   | 110,580.58   | $\pm 0.00$   |
| VAC7  | 9.83  | 0.00         | 357,272.00   | 329,264.00   | 197,814.00   | 421,547.00   | 0.00         | 729,797.67    | 719,603.00   | 396,677.00   | 0.00         | 1,442,898.00 | 0.00         | 0.00         |
|       |       | $\pm 0.00$   | $\pm 0.00$   | $\pm 0.00$   | $\pm 0.00$   | 10,535.26    | $\pm 0.00$   | 105,343.62    | 26,593.29    | $\pm 0.00$   | $\pm 0.00$   | 920,915.88   | $\pm 0.00$   | $\pm 0.00$   |
| VAC8  | 10.01 | 222,010.00   | 0.00         | 0.00         | 0.00         | 0.00         | 0.00         | 0.00          | 0.00         | 0.00         | 0.00         | 0.00         | 0.00         | 0.00         |
|       |       | $\pm 0.00$    | $\pm 0.00$   | $\pm 0.00$   | $\pm 0.00$   | $\pm 0.00$   | $\pm 0.00$   | $\pm 0.00$   |
| VAC9  | 12.07 | 0.00         | 0.00         | 0.00         | 8,692,493.00 | 0.00         | 3,539,349.00 | 0.00          | 0.00         | 0.00         | 6,610,292.00 | 751,574.67   | 1,438,496.50 | 0.00         |
|       |       | $\pm 0.00$    | $\pm 0.00$   | $\pm 0.00$   | $\pm 0.00$   | 236,635.19   | 463,449.58   | $\pm 0.00$   |
| VAC10 | 14.56 | 13,103,126.6 | 11,383,975.3 | 11,164,952.0 | 24,037,713.0 | 14,528,443.3 | 25,882,878.5 | 11,864,755.5  | 18,596,746.3 | 11,732,983.3 |              | 16,487,631.0 |              |              |
|       |       | 8,972,259.50 | 7            | 3            | 0            | 3            | 0            | 0             | 3            | 3            | 8,498,525.67 | 0            | 9,143,593.00 |              |
| VAC11 | 14.69 | 1,202,514.53 | 1,164,270.70 | 5,533,833.16 | 215,424.08   | $\pm 0.00$   | 665,781.36   | 2,182,322.67  | 6901.44      | 392,427.51   | 1,488,539.82 | 440,216.09   | $\pm 0.00$   | 610,361.40   |
|       |       | 12,962,094.0 | 20,654,426.0 |              |              | 24,463,542.5 |              | 28,570,558.0  |              |              |              |              |              |              |
| VAC12 | 15.69 | 0            | 0.00         | 0            | 0.00         | 0            | 0.00         | 0             | 0.00         | 0.00         | 0.00         | 0.00         | 0.00         | 0.00         |
|       |       | $\pm 0.00$   | $\pm 0.00$   | $\pm 0.00$   | $\pm 0.00$   | 1,303,889.11 | $\pm 0.00$   | $\pm 0.00$    | $\pm 0.00$   | $\pm 0.00$   | $\pm 0.00$   | $\pm 0.00$   | $\pm 0.00$   | $\pm 0.00$   |
| VAC13 | 15.80 | 267,392.00   | 0.00         | 0.00         | 0.00         | 0.00         | 0.00         | 0.00          | 0.00         | 0.00         | 757,989.00   | 468,579.33   | 409,202.00   | 0.00         |
|       |       | $\pm 0.00$    | $\pm 0.00$   | $\pm 0.00$   | $\pm 0.00$   | $\pm 0.00$   | $\pm 0.00$   | $\pm 0.00$   |
| VAC14 | 15.99 | 541,715.00   | 1,149,514.33 | 1,148,721.00 | 514,861.00   | 1,046,087.00 | 489,810.00   | 1,661,054.33  | 575,559.00   | 0.00         | 7,569,626.33 | 0.00         | 0.00         | 0.00         |
|       |       | 48,540.72    | 109,677.50   | 144,074.70   | 50,148.40    | 224,827.22   | 86,850.74    | 903,747.93    | 28,971.93    | $\pm 0.00$   | 7,109,565.07 | $\pm 0.00$   | $\pm 0.00$   | $\pm 0.00$   |
| VAC15 | 16.28 | 21,654,569.0 | 25,275,779.0 | 29,564,922.3 | 16,243,744.6 | 28,715,803.0 | 29,116,271.3 | 29,364,413.3  | 16,732,809.3 | 147,224,51.3 | 17,146,253.5 | 8,529,746.33 | 8,739,812.00 | 11,333,319.0 |
|       |       | 0            | 0            | 3            | 7            | 0            | 3            | 3             | 3            | 3            | 0            |              | 0            |              |
| VAC16 | 19.15 | 2,765,495.95 | 1,228,298.65 | 2,026,217.88 | 236,712.83   | 688,330.55   | 1,901,106.08 | 1,180,889.78  | 984,914.65   | 117,849.23   | 530,321.47   | 635,978.01   | 432,328.84   | 858,891.99   |
|       |       | 11,206,982.3 | 25,981,961.0 | 16,442,085.3 | 13,146,117.3 | 11,952,724.6 |              | 22,508,215.3  | 20,536,964.3 | 29,478,570.0 | 17,613,437.0 | 14,171,785.6 |              | 34,620,343.3 |
| VAC17 | 16.28 | 3            | 0            | 3            | 3            | 7            | 8,679,119.33 | 3             | 3            | 0            | 0            | 7            | 7,805,214.67 | 3            |
|       |       | 1,964,176.76 | 1,847,601.53 | 1,252,407.93 | 524,850.98   | 334,335.74   | 844,133.81   | 10,345,381.17 | 1,424,460.34 | 318,485.70   | 769,690.10   | 7,463,365.72 | 420,043.55   | 6,444,760.82 |
| VAC18 | 19.15 | 977,434.00   | 1,558,497.67 | 3,415,396.67 | 457,376.00   | 0.00         | 383,650.00   | 886,740.50    | 444,177.67   | 0.00         | 0.00         | 390,456.00   | 0.00         | 0.00         |
|       |       | 277,627.97   | 101,526.60   | 405,921.31   | 161,982.49   | $\pm 0.00$   | 4707.10      | 67,030.70     | 11364.34     | $\pm 0.00$   |

|       |       |            |              |              |            |            |              |              |              |              |              |              |              |              |
|-------|-------|------------|--------------|--------------|------------|------------|--------------|--------------|--------------|--------------|--------------|--------------|--------------|--------------|
| VAC17 | 19.41 | 635,074.00 | 2,655,743.67 | 1,615,585.00 | 797,998.33 | 386,986.00 | 1,151,424.33 | 4,586,270.33 | 5,480,612.67 | 9,867,656.00 | 2,210,302.00 | 12,144,151.6 | 4,325,683.67 | 15,814,294.6 |
|       |       | 193,473.09 | 458,800.92   | 98,104.91    | 57,207.30  | ±0.00      | 73,753.54    | 1,634,257.09 | 395,886.55   | 603,043.47   | 33,7654.00   | 1,984,404.32 | 661,647.50   | 1,105,565.92 |

Abbreviation: VAC: volatile aromatic compounds, as shown in Table 3; RT: retention time; Vintage: as shown in Table 1.

**Table S2.** Statistical parameters resulting from the machine learning models.

| Model   | Epoch | Gradient              | Mu                    | Validation checks | Effective number of parameters | Sum squared parameters |
|---------|-------|-----------------------|-----------------------|-------------------|--------------------------------|------------------------|
| Model 1 | 1000  | $6.16 \times 10^{-5}$ | 500                   | NA                | 169                            | $1.02 \times 10^4$     |
| Model 2 | 13    | 1.36                  | $1.00 \times 10^{-5}$ | 6                 | NA                             | NA                     |
| Model 3 | 259   | $3.23 \times 10^{10}$ | $5.00 \times 10^{10}$ | NA                | 233                            | $1.42 \times 10^3$     |

NA: not applicable.
